# Supplementary material for: Protection of the Peritoneal Membrane by Peritoneal Dialysis Effluent-Derived Mesenchymal Stromal Cells in a Rat Model of Chronic Peritoneal Dialysis
Source: Hindawi journal article supplement (doi:10.1155/2019/8793640), 2019-09-16
Supplement: f1 [file 8793640.f1.pdf]

Supplementary Table 1: Inactivation of inflammatory responses of macrophages by pMSCs-CM

| Affected gene transcripts | Fold changes by PMA/LPS (vs. Control) | P value (PMA/LPS vs. Control, n = 3) | Fold changed by pMSC-CM (vs PMA/LPS) | P value (PMA/LPS vs. PMA/LPS + 50%, n = 3) |
|---------------------------|---------------------------------------|--------------------------------------|--------------------------------------|--------------------------------------------|
| CXCL8                     | 535.95                                | <b>0.009573</b>                      | -9.14                                | 0.083365                                   |
| IL1B                      | 500.8                                 | <b>0.048456</b>                      | -6.25                                | 0.123176                                   |
| CXCL6                     | 242.74                                | <b>0.001276</b>                      | -10.08                               | <b>0.032372</b>                            |
| CXCL1                     | 235.55                                | 0.116816                             | -5.27                                | 0.247662                                   |
| CXCL3                     | 190.02                                | <b>0.038563</b>                      | -2.32                                | 0.133338                                   |
| IL1RN                     | 177.15                                | <b>0.004863</b>                      | -4.02                                | <b>0.037209</b>                            |
| CXCL2                     | 92.93                                 | 0.128867                             | -12.97                               | 0.153547                                   |
| CXCL5                     | 78                                    | 0.09673                              | -6.37                                | 0.401279                                   |
| IL6                       | 46.15                                 | 0.199307                             | -2.13                                | 0.476512                                   |
| CCL4                      | 33.91                                 | 0.118846                             | -1.81                                | 0.447106                                   |
| IL1A                      | 20.08                                 | 0.109787                             | -3.51                                | 0.26583                                    |
| NOS2                      | 11.17                                 | <b>0.007915</b>                      | -9.35                                | <b>0.008181</b>                            |
| PTGS2                     | 9.8                                   | 0.106712                             | -2.33                                | 0.302766                                   |
| LY96                      | 7.56                                  | 0.152586                             | -1.42                                | 0.521316                                   |
| CCL2                      | 6.83                                  | 0.122509                             | -4.45                                | 0.110069                                   |
| RIPK2                     | 6.02                                  | <b>0.013444</b>                      | -5.35                                | 0.058044                                   |
| BCL6                      | 5.27                                  | <b>0.029664</b>                      | -2.39                                | 0.085688                                   |
| CSF1                      | 4.9                                   | 0.080272                             | -1.88                                | 0.270602                                   |
| CCL3                      | 4.12                                  | 0.224417                             | -2.59                                | 0.273153                                   |
| CCL7                      | 4.01                                  | 0.209097                             | -2.64                                | 0.251111                                   |
| CCL5                      | 3.8                                   | 0.065136                             | -8.77                                | <b>0.017685</b>                            |
| ITGB2                     | 2.97                                  | <b>0.036245</b>                      | -2.54                                | 0.056093                                   |
| NR3C1                     | 2.45                                  | 0.234157                             | -7.81                                | <b>0.043945</b>                            |
| IL1R1                     | 2.25                                  | 0.147725                             | -1.47                                | 0.349567                                   |
| MYD88                     | 2.82                                  | 0.092337                             | -4.90                                | 0.058324                                   |
| TNF                       | 1.98                                  | 0.052401                             | -1.46                                | 0.140847                                   |
| CEBPB                     | 1.75                                  | 0.226914                             | -1.71                                | 0.089656                                   |
| CD14                      | 1.68                                  | 0.268575                             | -1.03                                | 0.593546                                   |
| C3                        | 1.35                                  | 0.284091                             | 1.39                                 | 0.106648                                   |
| C3AR1                     | -1.53                                 | 0.268667                             | 1.07                                 | 0.593999                                   |
| CCL11                     | -1.5                                  | 0.304463                             | 1.73                                 | 0.069919                                   |
| CCL13                     | 1.25                                  | 0.489838                             | -1.26                                | 0.173406                                   |
| CCL16                     | -1.2                                  | 0.665358                             | 1.69                                 | 0.108011                                   |
| CCL17                     | -1.12                                 | 0.936866                             | 1.68                                 | 0.186882                                   |
| CCL19                     | -1.16                                 | 0.700046                             | 1.82                                 | 0.142731                                   |
| CCL21                     | -1.21                                 | 0.565338                             | 1.24                                 | 0.466697                                   |
| CCL22                     | 1.27                                  | 0.185247                             | 1.22                                 | 0.24265                                    |
| CCL23                     | -1.79                                 | 0.327176                             | 1.02                                 | 0.871449                                   |
| CCL24                     | -1.12                                 | 0.575359                             | 1.33                                 | 0.129974                                   |
| CCL8                      | -1.26                                 | 0.548401                             | 1.51                                 | 0.176782                                   |

|         |       |          |       |                 |
|---------|-------|----------|-------|-----------------|
| CCR1    | -1.27 | 0.428263 | 1.74  | <b>0.026517</b> |
| CCR3    | -1.43 | 0.4268   | 1.92  | 0.065713        |
| CCR4    | 1.18  | 0.48383  | 1.92  | <b>0.01117</b>  |
| CCR7    | 1.05  | 0.887337 | 1.51  | 0.100115        |
| CD40LG  | -1.48 | 0.373571 | 1.39  | 0.397193        |
| CRP     | -1.07 | 0.929725 | 1.51  | 0.273909        |
| CXCL10  | -1.09 | 0.610765 | -2.76 | 0.312984        |
| CXCL9   | -1.67 | 0.138019 | 1.97  | <b>0.000092</b> |
| CXCR1   | -1.11 | 0.662785 | 1.60  | <b>0.035095</b> |
| CXCR2   | -1.29 | 0.430072 | 1.49  | 0.109703        |
| FASLG   | -1.38 | 0.373761 | 1.51  | 0.091681        |
| FOS     | 1.18  | 0.524644 | 1.37  | 0.256317        |
| IL10    | -1.38 | 0.309707 | 1.93  | <b>0.015066</b> |
| IL10RB  | 1.24  | 0.285129 | -1.19 | 0.366473        |
| IL18    | -1.16 | 0.622399 | -1.29 | 0.303259        |
| IL1RAP  | 1.05  | 0.916089 | 1.03  | 0.851851        |
| IL23A   | 1.12  | 0.851924 | 1.60  | <b>0.016877</b> |
| IL6R    | -1.36 | 0.179679 | 1.65  | <b>0.004205</b> |
| IL9     | -1.25 | 0.522482 | 1.93  | <b>0.024161</b> |
| KNG1    | -1.25 | 0.320858 | 1.80  | <b>0.01354</b>  |
| LTA     | -1.02 | 0.933977 | 1.53  | 0.197138        |
| LTB     | 1.11  | 0.711759 | 1.24  | 0.311127        |
| NFKB1   | -1.23 | 0.454782 | 1.18  | 0.299521        |
| SELE    | -1.2  | 0.477778 | 1.86  | <b>0.005707</b> |
| TIRAP   | -1.04 | 0.820124 | 1.24  | 0.283465        |
| TLR1    | 1.01  | 0.991327 | 1.34  | 0.24833         |
| TLR2    | 1.23  | 0.73762  | -1.72 | 0.183617        |
| TLR3    | -1.26 | 0.363668 | 2.17  | <b>0.008944</b> |
| TLR4    | -1.09 | 0.65828  | -1.13 | 0.421518        |
| TLR5    | -1.38 | 0.298214 | 1.86  | <b>0.036134</b> |
| TLR6    | -1.24 | 0.410177 | 1.25  | 0.098511        |
| TLR9    | 1.13  | 0.653286 | 1.50  | 0.20164         |
| TNFSF14 | 1.09  | 0.63339  | 1.49  | 0.177894        |
| TOLLIP  | 1.3   | 0.325699 | 1.13  | 0.740054        |
| CXCR4   | -2.14 | 0.127673 | 1.36  | 0.350269        |
| CCR2    | -2.42 | 0.076988 | 1.82  | 0.11419         |
| TLR7    | -8.43 | 0.285805 | -1.02 | 0.833967        |

The regulatory effects of pMSCs-CM on expression of inflammation-related seventy-seven gene transcripts in PMA/LPS-activated THP1 cells was examined by using PCR array. The fold change of each transcript level in experimental group as compared to control group (PMA/LPS vs. Control, or PMA/LPS + 50% pMSCs-CM vs. PMA/LPS) was presented in mean of three separate RNA samples (n = 3). – (negative number) represented downregulation. A P value of less than 0.05 was highlighted in bold

## Supplementary Table 1: Inactivation of inflammatory responses of macrophages by pMSCs-CM

The expression of a panel of monocyte/macrophage-expressing gene transcripts (total seventy-seven, as seen in the left column of the table) in THP1 cells from three different groups (Control, PMA/LPS, and PMA/LPS + 50% pMSCs-CM) was examined by using PCR array following manufacturer's instruction (SABiosciences – QIAGEN Inc., Valencia, CA, USA), and each group represented three separate samples. In brief, 1 µg of high quality total RNA from each sample was reverse transcribed to cDNA by using RT<sup>2</sup> First Strand Synthesis Kit (QIAGEN). The expression of selected genes was then amplified by real-time PCR using RT<sup>2</sup> Profile PCR arrays with PCR amplification conditions (10 min at 95°C, followed by 45 cycles of 15 s at 95°C and 60 s at 60°C) according to manufacturer's instruction (QIAGEN Inc.). The fold change of each target transcript and statistical comparison between groups were determined by using the manufacturer's online web analysis tools ([www.SABiosciences.com/pcrarraydataanalysis.php](http://www.SABiosciences.com/pcrarraydataanalysis.php)). A negative number indicated a fold decrease, whereas a positive number implied a fold increase.
